# Supplementary material
Source: PubMed Central journal article supplement (PMC3638804)
Supplement: NIHMS456595-supplement-s1.pdf [file NIHMS456595-supplement-s1.pdf]

## SAS Code for Fitting Dynamic Groups Models

In this supplement we provide SAS code and abridged output for the dynamic groups models for the two examples in the manuscript. The first example concerns school effects when examining trajectories of growth in science achievement and uses data from the Longitudinal Study of American Youth (LSAY; Miller, Hoffer, Suchner, Brown, and Nelson, 1992). The second example focuses on family effects within longitudinal data on developmental psychopathology and uses data from the Michigan Longitudinal Study (MLS; Zucker, Fitzgerald, Refior, Puttler, Pallas and Ellis, 2000).

In fitting and interpreting models using the stabilizing banded structure, we make use of the companion macro file **stableband.sas**.

### *Example 1: Schools as Dynamic Groups*

For this analysis the data set is referred to as **canalysis** and the variables are named and defined as follows:

|                     |                                                                                                                                                        |
|---------------------|--------------------------------------------------------------------------------------------------------------------------------------------------------|
| <b>LSAYID</b>       | a unique ID variable identifying the student                                                                                                           |
| <b>schcode</b>      | a unique ID variable identifying the school                                                                                                            |
| <b>sci</b>          | science achievement                                                                                                                                    |
| <b>grade</b>        | coded as 0 = 10 <sup>th</sup> grade, 1 = 11 <sup>th</sup> grade, 2=12 <sup>th</sup> grade.                                                             |
| <b>cohort</b>       | coded as 0 = first (began 10 <sup>th</sup> grade in 1987), 1 = second (began 10 <sup>th</sup> grade in 1990)                                           |
| <b>year</b>         | calendar year, represented by the last two digits (e.g., 1990 is coded as 90)                                                                          |
| <b>cstud_fund</b>   | school-mean-centered measure of a student's fundamentalist attitudes towards science and religion (referenced in the manuscript as <b>studentatt</b> ) |
| <b>schmean_fund</b> | school mean of students' fundamentalist attitudes towards science and religion (referenced in the manuscript as <b>schoolatt</b> )                     |
| <b>cstud_ses</b>    | school-mean-centered measure of a student's socioeconomic status (referenced in the manuscript as <b>studentSES</b> )                                  |
| <b>schmean_ses</b>  | school mean of students' socioeconomic status (referenced in the manuscript as <b>schoolSES</b> )                                                      |

As described in the manuscript, we fit a sequence of models to this data varying in the covariance structure at the school level and in the inclusion of student- and school-level predictors. We provide example code for all dynamic groups models; however, we present output only for the final, selected models.

All unconditional models include the same fixed effects, as stipulated in the **model** statement; likewise, all conditional models include the same fixed effects (and include additional predictors). Student-level trajectories are also allowed to differ in their intercepts and slopes

(by grade) in all models, as indicated in the first **random** statement. It is in the specification of the second **random** statement, for the school-level random effects, that the models differ. Random effects of **year** are included in each model, but the structure of these random effects varies between models as indicated in the **type** option. It is important that the variable **year** is declared as a categorical variable within the **class** statement.

### Fitting Unconditional Models

The following code specifies an unrestricted covariance structure for the school effects over time (note **type=un** in the second **random** statement):

```
proc mixed data=canalysis method=reml maxiter=1000 cl;
class lsayid schcode year;
model sci=grade cohort grade*cohort/solution ddfm=bw notest alpha=.05;
random intercept grade/subject=lsayid(schcode) type=un;
random year / subject=schcode type=un;
run;
```

A Toeplitz structure can be specified for time-varying school effects as follows (**type=toep**):

```
proc mixed data=canalysis method=reml maxiter=1000 cl;
class lsayid schcode year;
model sci=grade cohort grade*cohort/solution ddfm=bw notest alpha=.05;
random intercept grade/subject=lsayid(schcode) type=un;
random year / subject=schcode type=toep;
run;
```

The following code implements the CS structure (**type=cs**):

```
proc mixed data=canalysis method=reml maxiter=1000 cl;
class lsayid schcode year;
model sci=grade cohort grade*cohort/solution ddfm=bw notest alpha=.05;
random intercept grade/subject=lsayid(schcode) type=un;
random year / subject=schcode type=cs;
run;
```

The AR(1) structure is obtained as follows (**type=ar(1)**):

```
proc mixed data=canalysis method=reml maxiter=1000 cl;
class lsayid schcode year;
model sci=grade cohort grade*cohort/solution ddfm=bw notest alpha=.05;
random intercept grade/subject=lsayid(schcode) type=un;
random year / subject=schcode type=ar(1);
run;
```

And the ARMA(1,1) structure is obtained as follows (**type=arma(1,1)**):

```
proc mixed data=canalysis method=reml maxiter=1000;
class lsayid schcode year;
model sci=grade cohort grade*cohort/solution ddfm=bw notest alpha=.05;
random intercept grade/subject=lsayid(schcode) type=un;
random year / subject=schcode type=arma(1,1);
run;
```

The stabilizing banded structure is not a default structure available within SAS, so we make use of the flexibility of the **type=lin( $q$ )** structure, or general linear covariance structure. With this option,  $q$  is the number of parameters, and the structure is determined via a matrix constructed in a data step and input through the **ldata** option. We have provided a macro, called **stableband.sas**, which automatically constructs this matrix within a data set named **sb**. The **stableband** macro can be saved to a file and read in prior to fitting the model, as shown here:

```
filename dynggrp 'C:\Users\bauer\documents\Projects\Dynamic Groups';
%include dynggrp(SB.sas);
```

(Replace the directory in the **filename** statement to the local directory in which **stableband.sas** has been saved).

Alternatively, one can simply copy-paste the syntax within **stableband.sas** to run prior to the **proc mixed** syntax. The syntax is given here:

```
%macro stableband(lag=1,Gtimes=6);
data sb;
do p = 1 to &lag. + 1;
  do i = 1 to &Gtimes.;
    array col[&Gtimes.] col1-col&Gtimes.;
    do j = 1 to &Gtimes.;
      parm = p;
      row = i;
      if p < &lag. + 1 then do;
        if (i-j) = p-1 then col[j] = 1; else col[j]=0;
      end;
      else do;
        if j <= i - &lag. then col[j] = 1; else col[j]=0;
      end;
    end;
  output;
end;
end;
drop j i p;
run;
%mend;
```

Two arguments are required when calling the SB macro, specifically the number of time points the groups were observed (**GTimes**) and the lag at which the covariances stabilize (**lag**). For instance, in the LSAY data there are up to six time points per school, so **GTimes=6**. Our specification of the **lag** argument determines the covariance structure. If we specify that the covariances stabilize at lag 1 then  $q=2$  and we will replicate the **type=cs** structure. At the other extreme, if we specify that the covariances stabilize at lag 5 then  $q=6$  and we will replicate the **type=toep** structure. Since we have already fit these models, we are more interested in situations in which the covariances stabilize at an intermediate lags, that is the covariance structures referenced in the manuscript as SB(2), SB(3), and SB(4).

The SB(2) structure is fit with the following code:

```
%stableband(lag=2,Gtimes=6);
proc mixed data=canalysis method=reml maxiter=1000 cl;
class lsayid schcode year;
model sci=grade cohort grade*cohort/solution ddfm=bw notest alpha=.05;
random intercept grade / subject=lsayid(schcode) type=un;
random year / subject=schcode type=lin(3) ldata=sb;
parms
(100)
(-1.5)
(5)
(12)
(10)
(10)
(10)
(10)
/lowerb=0,.,0,0,0,0,0;
ods output covparms=covparms;
run;
```

Note that the call to the **stableband** macro precedes the **proc mixed** code, and that we specified **lag=2**. We use **type=lin(3)** to indicate that we are using the general linear covariance structure with three parameters (the lag 1 and lag 2+ covariance parameters and the variance parameter), and we use **ldata=sb** to indicate the form of the covariance structure (recall that the **stableband** macro generated the **sb** data file).

To fit the SB(3) structure, we simply modify the macro argument to **lag=3** and indicate that now  $q=4$  in the **type=lin( $q$ )** option.

```
%stableband(lag=3,Gtimes=6);
proc mixed data=canalysis method=reml maxiter=1000 cl;
class lsayid schcode year;
model sci=grade cohort grade*cohort/solution ddfm=bw notest alpha=.05;
random intercept grade / subject=lsayid(schcode) type=un;
random year / subject=schcode type=lin(4) ldata=sb;
parms
(100)
(-1.5)
(5)
(12)
(10)
(10)
(10)
(10)
(10)
(10)
/lowerb=0,.,0,0,0,0,0,0;
run;
```



## Fitting Conditional Models

Conditional models were fit using syntax that was nearly identical to the syntax for the unconditional models, with the exception that additional fixed effects were included for the predictors in the **model** statement. That is, the model statement was modified to be

```
model sci = grade cohort grade*cohort
          cstud_fund cstud_ses
          schmean_fund schmean_ses/
          solution ddfm=bw notest alpha=.05;
```

## Output from Optimally Fitting Models

As described in the manuscript, the optimally fitting covariance structure for both the unconditional and conditional models was the SB(4) structure. Abridged results from the unconditional model are shown here:

| The Mixed Procedure             |                                              |                 |            |
|---------------------------------|----------------------------------------------|-----------------|------------|
| Model Information               |                                              |                 |            |
| Data Set                        | WORK.CANALYSIS                               |                 |            |
| Dependent Variable              | sci                                          |                 |            |
| Covariance Structures           | Unstructured, Linear,<br>Variance Components |                 |            |
| Subject Effects                 | LSAYID(schcode), schcode                     |                 |            |
| Estimation Method               | REML                                         |                 |            |
| Residual Variance Method        | Parameter                                    |                 |            |
| Fixed Effects SE Method         | Model-Based                                  |                 |            |
| Degrees of Freedom Method       | Between-Within                               |                 |            |
| Dimensions                      |                                              |                 |            |
| Covariance Parameters           | 9                                            |                 |            |
| Columns in X                    | 4                                            |                 |            |
| Columns in Z Per Subject        | 304                                          |                 |            |
| Subjects                        | 51                                           |                 |            |
| Max Obs Per Subject             | 399                                          |                 |            |
| Number of Observations          |                                              |                 |            |
| Number of Observations Read     | 7756                                         |                 |            |
| Number of Observations Used     | 7756                                         |                 |            |
| Number of Observations Not Used | 0                                            |                 |            |
| Iteration History               |                                              |                 |            |
| Iteration                       | Evaluations                                  | -2 Res Log Like | Criterion  |
| 1                               | 2                                            | 52134.85855691  | 0.00155910 |
| 2                               | 1                                            | 52121.72942851  | 0.00039101 |
| 3                               | 1                                            | 52112.86374848  | 0.00009613 |
| 4                               | 1                                            | 52110.65980331  | 0.00002071 |
| 5                               | 1                                            | 52110.20392529  | 0.00000200 |

|                                |                 |                          |                |            |         |       |         |         |
|--------------------------------|-----------------|--------------------------|----------------|------------|---------|-------|---------|---------|
|                                | 6               | 1                        | 52110.16348783 | 0.00000002 |         |       |         |         |
|                                | 7               | 1                        | 52110.16302501 | 0.00000000 |         |       |         |         |
| Convergence criteria met.      |                 |                          |                |            |         |       |         |         |
| Covariance Parameter Estimates |                 |                          |                |            |         |       |         |         |
| Cov Parm                       | Subject         | Estimate                 | Alpha          | Lower      | Upper   |       |         |         |
| UN(1,1)                        | LSAYID(schcode) | 93.7106                  | 0.05           | 88.9250    | 98.8951 |       |         |         |
| UN(2,1)                        | LSAYID(schcode) | -1.2697                  | 0.05           | -2.7480    | 0.2087  |       |         |         |
| UN(2,2)                        | LSAYID(schcode) | 4.7079                   | 0.05           | 4.0213     | 5.5878  |       |         |         |
| LIN(1)                         | schcode         | 14.5683                  | 0.05           | 10.0678    | 22.9538 |       |         |         |
| LIN(2)                         | schcode         | 13.5601                  | 0.05           | 9.1585     | 22.1314 |       |         |         |
| LIN(3)                         | schcode         | 12.8337                  | 0.05           | 8.5128     | 21.5499 |       |         |         |
| LIN(4)                         | schcode         | 12.2778                  | 0.05           | 8.0063     | 21.1907 |       |         |         |
| LIN(5)                         | schcode         | 10.7946                  | 0.05           | 6.6717     | 20.3949 |       |         |         |
| Residual                       |                 | 10.1192                  | 0.05           | 9.4815     | 10.8238 |       |         |         |
| Fit Statistics                 |                 |                          |                |            |         |       |         |         |
|                                |                 | -2 Res Log Likelihood    | 52110.2        |            |         |       |         |         |
|                                |                 | AIC (smaller is better)  | 52128.2        |            |         |       |         |         |
|                                |                 | AICC (smaller is better) | 52128.2        |            |         |       |         |         |
|                                |                 | BIC (smaller is better)  | 52145.5        |            |         |       |         |         |
| Solution for Fixed Effects     |                 |                          |                |            |         |       |         |         |
| Effect                         | Estimate        | Standard Error           | DF             | t Value    | Pr >  t | Alpha | Lower   | Upper   |
| Intercept                      | 60.4817         | 0.5806                   | 50             | 104.18     | <.0001  | 0.05  | 59.3157 | 61.6478 |
| grade                          | 2.4860          | 0.1580                   | 7702           | 15.73      | <.0001  | 0.05  | 2.1762  | 2.7957  |
| COHORT                         | 1.4808          | 0.4795                   | 7702           | 3.09       | 0.0020  | 0.05  | 0.5409  | 2.4207  |
| grade*COHORT                   | -0.6219         | 0.2389                   | 7702           | -2.60      | 0.0092  | 0.05  | -1.0901 | -0.1536 |

These estimates match the results shown in Table 3 (Model 1) of the manuscript. See the manuscript for interpretation of the fixed effects.

The student-level covariance parameter estimates are interpreted as follows:

- UN(1,1) is the variance of the student-level trajectory intercepts (variability in 10<sup>th</sup> grade science achievement)
- UN(2,1) is the covariance of the student-level intercepts and slopes
- UN(2,2) is the variance of the student-level trajectory slopes (variability in change over time)

The school-level covariance parameter estimates are interpreted as follows:

- The LIN(1) parameter estimate corresponds to the variance of the school effects.





```

end;
end;
print cov;
corr = inv(sqrt(diag(cov))) * cov * inv(sqrt(diag(cov)));
print corr;
quit;

```

The snippet “**where(subject="schcode")**” selects only the school-level covariance parameter estimates. For other applications this code should be modified to reference the appropriate group-level ID variable. Additionally, the code “**Gtimes=6; stablelag=4;**” is used to define the number of time points over which the groups were observed and to define the lag at which the covariances stabilize (here lag 4). These values too should be modified to be appropriate to the specific application.

The output produced by **proc iml** is shown here:

```

                                Linq
                                14.568339
                                13.560148
                                12.833693
                                12.277768
                                10.794648

                                cov
14.568339 13.560148 12.833693 12.277768 10.794648 10.794648
13.560148 14.568339 13.560148 12.833693 12.277768 10.794648
12.833693 13.560148 14.568339 13.560148 12.833693 12.277768
12.277768 12.833693 13.560148 14.568339 13.560148 12.833693
10.794648 12.277768 12.833693 13.560148 14.568339 13.560148
10.794648 10.794648 12.277768 12.833693 13.560148 14.568339

                                corr
                                1 0.9307957 0.8809304 0.8427706 0.7409663 0.7409663
0.9307957                                1 0.9307957 0.8809304 0.8427706 0.7409663
0.8809304 0.9307957                                1 0.9307957 0.8809304 0.8427706
0.8427706 0.8809304 0.9307957                                1 0.9307957 0.8809304
0.7409663 0.8427706 0.8809304 0.9307957                                1 0.9307957
0.7409663 0.7409663 0.8427706 0.8809304 0.9307957                                1

```

The column of values labeled “**Linq**” repeats the covariance parameter estimates at the school level. The output labeled “**cov**” and “**corr**” corresponds to the covariance and correlation matrices of the school effects, respectively. Thus we see that the correlation in the school effects between adjacent years is .93. Across two years the correlation drops to .88. Across three years, the correlation drops to .84. The correlation stabilizes at four or more years of separation at .74. Plotting these correlations produces the trend shown in Figure 2 (Model 1) of the manuscript.

The optimally fitting conditional model also used the SB(4) covariance structure for the school effects. Output for the covariance parameter estimates and fixed effects estimates match the values shown in Table 3 (Model 2):

| Covariance Parameter Estimates |                 |          |       |         |         |
|--------------------------------|-----------------|----------|-------|---------|---------|
| Cov Parm                       | Subject         | Estimate | Alpha | Lower   | Upper   |
| UN(1,1)                        | LSAYID(schcode) | 87.9728  | 0.05  | 83.4454 | 92.8807 |
| UN(2,1)                        | LSAYID(schcode) | -1.4188  | 0.05  | -2.8575 | 0.02002 |
| UN(2,2)                        | LSAYID(schcode) | 4.7040   | 0.05  | 4.0180  | 5.5831  |
| LIN(1)                         | schcode         | 9.9908   | 0.05  | 6.8100  | 16.0757 |
| LIN(2)                         | schcode         | 8.9921   | 0.05  | 5.9212  | 15.2765 |
| LIN(3)                         | schcode         | 8.1997   | 0.05  | 5.2306  | 14.6766 |
| LIN(4)                         | schcode         | 7.6346   | 0.05  | 4.7267  | 14.3813 |
| LIN(5)                         | schcode         | 6.1826   | 0.05  | 3.4611  | 14.0573 |
| Residual                       |                 | 10.1192  | 0.05  | 9.4817  | 10.8235 |

  

| Fit Statistics           |         |
|--------------------------|---------|
| -2 Res Log Likelihood    | 51883.8 |
| AIC (smaller is better)  | 51901.8 |
| AICC (smaller is better) | 51901.9 |
| BIC (smaller is better)  | 51919.2 |

  

| Solution for Fixed Effects |          |                |      |         |         |       |          |         |
|----------------------------|----------|----------------|------|---------|---------|-------|----------|---------|
| Effect                     | Estimate | Standard Error | DF   | t Value | Pr >  t | Alpha | Lower    | Upper   |
| Intercept                  | 60.5443  | 0.4953         | 48   | 122.25  | <.0001  | 0.05  | 59.5485  | 61.5401 |
| grade                      | 2.4888   | 0.1603         | 7700 | 15.53   | <.0001  | 0.05  | 2.1747   | 2.8030  |
| COHORT                     | 1.3183   | 0.4743         | 7700 | 2.78    | 0.0055  | 0.05  | 0.3885   | 2.2480  |
| grade*COHORT               | -0.6105  | 0.2440         | 7700 | -2.50   | 0.0124  | 0.05  | -1.0888  | -0.1322 |
| cstud_fund                 | -2.6751  | 0.3530         | 7700 | -7.58   | <.0001  | 0.05  | -3.3671  | -1.9831 |
| cstud_ses                  | 0.1253   | 0.01116        | 7700 | 11.23   | <.0001  | 0.05  | 0.1034   | 0.1472  |
| schmean_fund               | -8.3805  | 3.9987         | 48   | -2.10   | 0.0414  | 0.05  | -16.4204 | -0.3407 |
| schmean_ses                | 0.1211   | 0.1057         | 48   | 1.15    | 0.2578  | 0.05  | -0.09152 | 0.3337  |

The fixed effects are interpreted within the manuscript. The school-level covariance parameters are labeled as described for the unconditional model above. These parameters are also interpreted similarly – except that they now represent the residual (co)variances. As illustrated above, these estimates can be arrayed into a residual covariance matrix and used to construct a residual correlation matrix. These correlations can be plotted to produce the trend shown in Figure 2 (Model 2).

### Example 2: Families as Dynamic Groups

For this analysis the data set is referred to as **allkidssubset** and the variables are named and defined as follows:

|                   |                                                                                                   |
|-------------------|---------------------------------------------------------------------------------------------------|
| <b>kidid</b>      | a unique ID variable identifying the child                                                        |
| <b>family</b>     | a unique ID variable identifying the school                                                       |
| <b>intscore</b>   | depression score for the child                                                                    |
| <b>extscore</b>   | externalizing behavior score for the child                                                        |
| <b>ageyrc</b>     | age of the child in years, centered at age 14                                                     |
| <b>intyear</b>    | calendar year when interview assessing child depression and externalizing behavior were conducted |
| <b>kidgen</b>     | sex of the child, coded 0=female, 1=male                                                          |
| <b>coa</b>        | indicator of parental history of alcohol disorder; coded 0=no, 1=yes                              |
| <b>parentanti</b> | indicator of parental history of antisocial personality disorder; coded 0=no, 1=yes               |
| <b>parentdep</b>  | indicator of parental history of depression/dysthymia; coded 0=no, 1=yes                          |

To reduce redundancy with the documentation of the prior example, here we focus specifically on the code for the optimally fitting dynamic groups models. For this example, an AR(1) structure for time-varying family effects resulted in the best fit to the data. The unconditional model (model 1) was fit via the following code:

```
proc mixed data=allkidssubset method=reml covtest cl maxiter=1000;
class family intyear kidid;
model extscore=ageyrc ageyrc*ageyrc/solution ddfm=bw notest alpha=.05;
random intercept ageyrc ageyrc*ageyrc/subject=kidid(family) type=un;
random intyear/subject=family type=ar(1);
run;

proc mixed data=allkidssubset method=reml covtest maxiter=1000;
class family intyear kidid;
model intscore=ageyrc ageyrc*ageyrc/solution ddfm=bw notest alpha=.05;
random intercept ageyrc ageyrc*ageyrc/subject=kidid(family) type=un;
random intyear/subject=family type=ar(1);
run;
```

Note the **type=ar(1)** specification in the second **random** statement for each outcome.

The conditional model (model 2) differed in the inclusion of additional predictors, augmenting the **model** statement for each outcome:

```
proc mixed data=allkidssubset method=reml covtest cl maxiter=1000;
class family intyear kidid;
model extscore=ageyrc ageyrc*ageyrc kidgen kidgen*ageyrc
      kidgen*ageyrc*ageyrc coa parentanti parentdep/solution ddfm=bw
      notest alpha=.05;
random intercept ageyrc ageyrc*ageyrc/subject=kidid(family) type=un;
random intyear/subject=family type=ar(1);
run;

proc mixed data=allkidssubset method=reml covtest cl maxiter=1000;
class family intyear kidid;
model intscore=ageyrc ageyrc*ageyrc kidgen kidgen*ageyrc coa
      parentanti parentdep/solution ddfm=bw notest alpha=.05;
random intercept ageyrc ageyrc*ageyrc/subject=kidid(family) type=un;
random intyear/subject=family type=ar(1);
run;
```

Below we show sample output from the unconditional model for externalizing behavior:

| Covariance Parameter Estimates |               |          |                |         |         |       |          |          |
|--------------------------------|---------------|----------|----------------|---------|---------|-------|----------|----------|
| Cov Parm                       | Subject       | Estimate | Standard Error | Z Value | Pr >  Z | Alpha | Lower    | Upper    |
| UN(1,1)                        | kidID(family) | 0.2806   | 0.03452        | 8.13    | <.0001  | 0.05  | 0.2235   | 0.3627   |
| UN(2,1)                        | kidID(family) | 0.01289  | 0.005836       | 2.21    | 0.0272  | 0.05  | 0.001451 | 0.02433  |
| UN(2,2)                        | kidID(family) | 0.007864 | 0.002226       | 3.53    | 0.0002  | 0.05  | 0.004835 | 0.01499  |
| UN(3,1)                        | kidID(family) | -0.00586 | 0.002918       | -2.01   | 0.0446  | 0.05  | -0.01158 | -0.00014 |
| UN(3,2)                        | kidID(family) | -0.00154 | 0.000633       | -2.44   | 0.0149  | 0.05  | -0.00278 | -0.00030 |
| UN(3,3)                        | kidID(family) | 0.000746 | 0.000436       | 1.71    | 0.0437  | 0.05  | 0.000307 | 0.003723 |
| Variance                       | family        | 0.1358   | 0.02676        | 5.07    | <.0001  | 0.05  | 0.09552  | 0.2084   |
| AR(1)                          | family        | 0.8190   | 0.04881        | 16.78   | <.0001  | 0.05  | 0.7233   | 0.9147   |
| Residual                       |               | 0.2098   | 0.01059        | 19.81   | <.0001  | 0.05  | 0.1905   | 0.2322   |

  

| Fit Statistics           |  |        |
|--------------------------|--|--------|
| -2 Res Log Likelihood    |  | 4825.9 |
| AIC (smaller is better)  |  | 4843.9 |
| AICC (smaller is better) |  | 4844.0 |
| BIC (smaller is better)  |  | 4876.6 |

  

| Solution for Fixed Effects |          |                |      |         |         |       |          |          |
|----------------------------|----------|----------------|------|---------|---------|-------|----------|----------|
| Effect                     | Estimate | Standard Error | DF   | t Value | Pr >  t | Alpha | Lower    | Upper    |
| Intercept                  | 0.3899   | 0.03339        | 278  | 11.68   | <.0001  | 0.05  | 0.3242   | 0.4556   |
| ageyrc                     | 0.008677 | 0.008429       | 2182 | 1.03    | 0.3034  | 0.05  | -0.00785 | 0.02521  |
| ageyrc*ageyrc              | -0.01488 | 0.003625       | 2182 | -4.10   | <.0001  | 0.05  | -0.02199 | -0.00777 |

Focusing on the covariance parameter estimates, the child-level parameters describe variability in the growth trajectories of externalizing behavior with age:

- UN(1,1) is the variance of the child-level trajectory intercepts (variability in externalizing behavior at age 14)
- UN(2,1) is the covariance of the child-level intercepts and linear slopes
- UN(2,2) is the variance of the child-level trajectory linear slopes (rates of change in externalizing behavior at age 14)
- UN(3,1) is the covariance of the child-level intercepts and quadratic slopes
- UN(3,2) is the covariance of the child-level linear and quadratic slopes
- UN(3,3) is the variance of the child-level trajectory quadratic slopes (rates of acceleration/deceleration in change over time)

The family-level covariance parameter estimates are interpreted as follows:

- The Variance parameter estimate corresponds to the variance of the family effects.
- AR(1) parameter estimate corresponds to the autocorrelation of the family effects.

The AR(1) estimate of .819 can be interpreted as the correlation of family effects across a one-year interval. Across a  $n$ -year interval, the correlation is implied to be  $.819^n$ , and one can easily compute these correlations across all of the observed intervals to produce a plot of the correlations over time.

Sample output for the conditional model for externalizing behavior is shown here:

| Covariance Parameter Estimates |               |          |                |         |         |       |          |          |
|--------------------------------|---------------|----------|----------------|---------|---------|-------|----------|----------|
| Cov Parm                       | Subject       | Estimate | Standard Error | Z Value | Pr >  Z | Alpha | Lower    | Upper    |
| UN(1,1)                        | kidID(family) | 0.2646   | 0.03094        | 8.55    | <.0001  | 0.05  | 0.2130   | 0.3375   |
| UN(2,1)                        | kidID(family) | 0.01617  | 0.005313       | 3.04    | 0.0023  | 0.05  | 0.005758 | 0.02659  |
| UN(2,2)                        | kidID(family) | 0.007892 | 0.002114       | 3.73    | <.0001  | 0.05  | 0.004966 | 0.01446  |
| UN(3,1)                        | kidID(family) | -0.00725 | 0.002751       | -2.64   | 0.0084  | 0.05  | -0.01264 | -0.00186 |
| UN(3,2)                        | kidID(family) | -0.00107 | 0.000595       | -1.79   | 0.0730  | 0.05  | -0.00223 | 0.000100 |
| UN(3,3)                        | kidID(family) | 0.000651 | 0.000417       | 1.56    | 0.0595  | 0.05  | 0.000251 | 0.004060 |
| Variance                       | family        | 0.08608  | 0.02154        | 4.00    | <.0001  | 0.05  | 0.05565  | 0.1507   |
| AR(1)                          | family        | 0.7568   | 0.07341        | 10.31   | <.0001  | 0.05  | 0.6129   | 0.9006   |
| Residual                       |               | 0.2124   | 0.01069        | 19.87   | <.0001  | 0.05  | 0.1929   | 0.2350   |

  

| Fit Statistics           |        |
|--------------------------|--------|
| -2 Res Log Likelihood    | 4736.5 |
| AIC (smaller is better)  | 4754.5 |
| AICC (smaller is better) | 4754.5 |
| BIC (smaller is better)  | 4787.2 |

  

| Solution for Fixed Effects |          |                |     |         |         |       |         |          |
|----------------------------|----------|----------------|-----|---------|---------|-------|---------|----------|
| Effect                     | Estimate | Standard Error | DF  | t Value | Pr >  t | Alpha | Lower   | Upper    |
| Intercept                  | -0.1329  | 0.07039        | 275 | -1.89   | 0.0601  | 0.05  | -0.2715 | 0.005663 |

|                      |          |          |      |       |        |      |          |          |
|----------------------|----------|----------|------|-------|--------|------|----------|----------|
| ageyrc               | 0.05514  | 0.01459  | 2179 | 3.78  | 0.0002 | 0.05 | 0.02653  | 0.08376  |
| ageyrc*ageyrc        | -0.03425 | 0.006716 | 2179 | -5.10 | <.0001 | 0.05 | -0.04742 | -0.02108 |
| kidgen               | 0.2168   | 0.06173  | 2179 | 3.51  | 0.0005 | 0.05 | 0.09573  | 0.3378   |
| ageyrc*kidgen        | -0.07006 | 0.01723  | 2179 | -4.07 | <.0001 | 0.05 | -0.1038  | -0.03628 |
| ageyrc*ageyrc*kidgen | 0.02772  | 0.008011 | 2179 | 3.46  | 0.0005 | 0.05 | 0.01201  | 0.04343  |
| coa                  | 0.4153   | 0.06317  | 275  | 6.57  | <.0001 | 0.05 | 0.2909   | 0.5396   |
| parentanti           | 0.2065   | 0.07976  | 275  | 2.59  | 0.0101 | 0.05 | 0.04948  | 0.3635   |
| parentdep            | 0.09789  | 0.06362  | 275  | 1.54  | 0.1251 | 0.05 | -0.02736 | 0.2231   |

The covariance parameter estimates are labeled and interpreted as indicated above, with the exception that these are now residuals.

See the primary manuscript for further interpretation of these results.

### *References*

- Miller, J., Hoffer, T., Suchner, R., Brown, K., & Nelson, C. (1992). LSAY codebook. DeKalb: Northern Illinois University.
- Zucker, R.A., Fitzgerald, H.E., Refior, S.K., Puttler, L.I., Pallas, D. M., & Ellis, D.A. (2000). The clinical and social ecology of childhood for children of alcoholics: Description of a study and implications for a differentiated social policy. In H.E. Fitzgerald, B.M. Lester & B.S. Zuckerman (Eds.), *Children of addiction: Research, health, and policy issues*. (Chapter 4, pp. 109-141). New York, NY: Routledge Falmer.
